# Supplementary material for: Catalytic performance of Pdn (n = 1, 2, 3, 4 and 6) clusters supported on TiO2-V for the formation of dimethyl oxalate via the CO catalytic coupling reaction: a theoretical study
Source: Royal Society of Chemistry journal article supplement (doi:10.1039/c9cp06773f), 2020-01-01
Supplement: c9cp06773f1.pdf [file c9cp06773f1.pdf]

# Catalytic performance of Pd<sub>n</sub>(n=1, 2, 3, 4 and 6) clusters supported on TiO<sub>2-V</sub> for the formation of dimethyl oxalate via CO catalytic coupling reaction: A theoretical study

Lixia Ling<sup>a,b</sup>, Yueting Cao<sup>a</sup>, Min Han<sup>a</sup>, Ping Liu<sup>b</sup>, Riguang Zhang<sup>c</sup> and Baojun Wang<sup>1</sup>,

c

<sup>a</sup> College of Chemistry and Chemical Engineering, Taiyuan University of Technology, Taiyuan 030024, P.R. China

<sup>b</sup> State Key Laboratory of Coal Conversion, Institute of Coal Chemistry, Chinese Academy of Sciences, Taiyuan 030001, P.R. China

<sup>c</sup> Key Laboratory of Coal Science and Technology of Ministry of Education and Shanxi Province, Taiyuan University of Technology, Taiyuan 030024, P.R. China

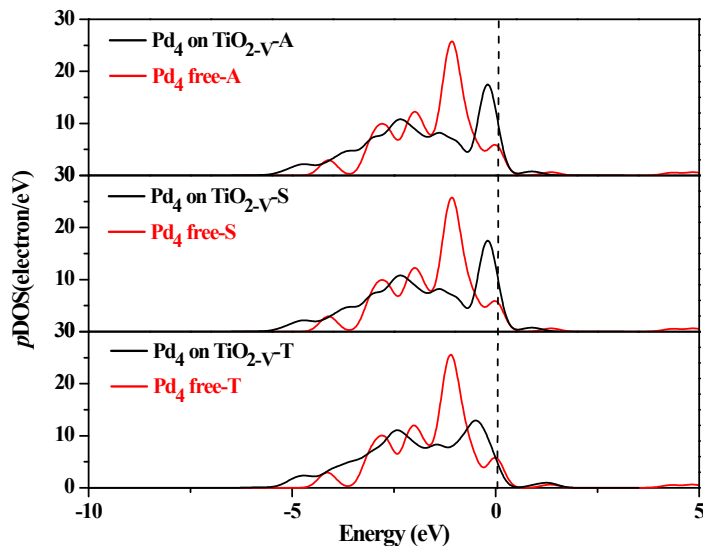

**Fig. S1** Partial density of states (*pDOS*) for Pd<sub>4</sub> cluster on TiO<sub>2-V</sub> with different multiplicities. Black line represents Pd<sub>4</sub> cluster supported on TiO<sub>2-V</sub>, and red line represents free Pd<sub>4</sub> cluster. The suffix A, S and T represents different spin states, A shows that spin state is not fixed, S shows that spin state is singlet, and T shows that spin state is triplet.

<sup>1</sup> Corresponding author at: No. 79 West Yingze Street, Taiyuan 030024, China. Tel.: +86 351 6010898; Fax: +86 351 6041237; E-mail address: [wangbaojun@tyut.edu.cn](mailto:wangbaojun@tyut.edu.cn) (B.J. Wang)

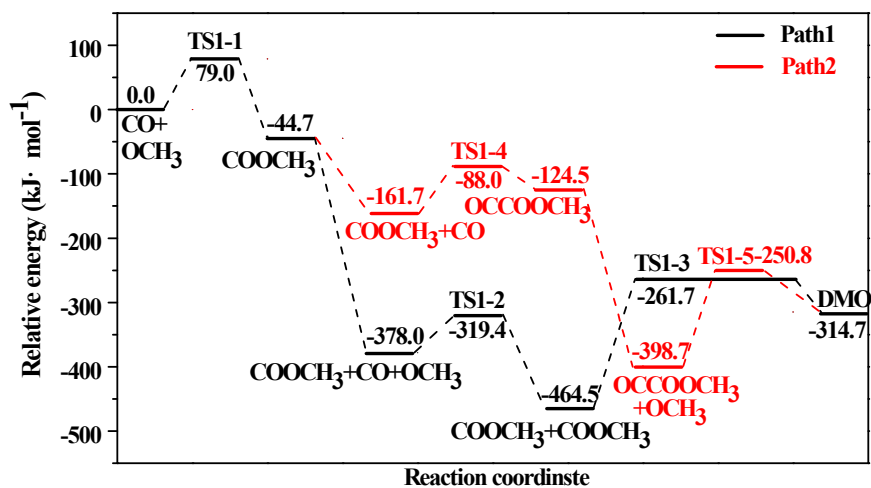

Fig. S2 The potential energy profile for the CO catalytic coupling reaction to DMO on Pd<sub>2</sub>/TiO<sub>2</sub>.

v.

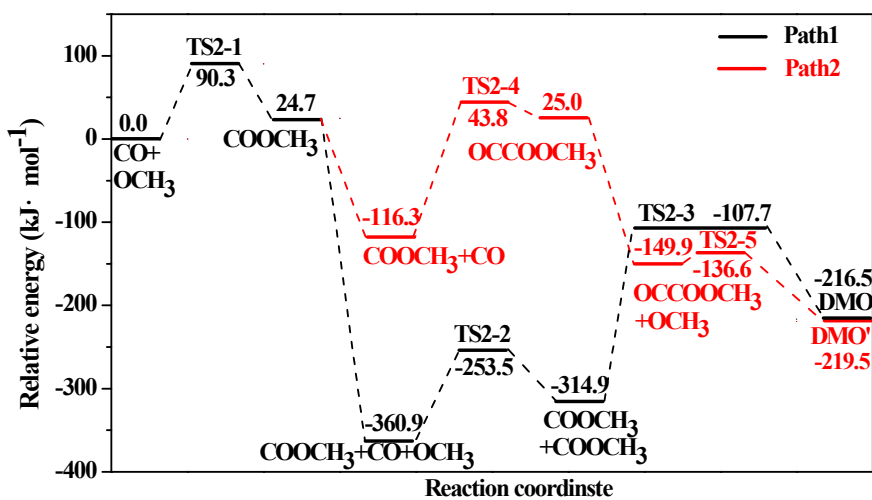

Fig. S3 The potential energy profile for the formation of DMO on Pd<sub>3</sub>/TiO<sub>2</sub>.v.

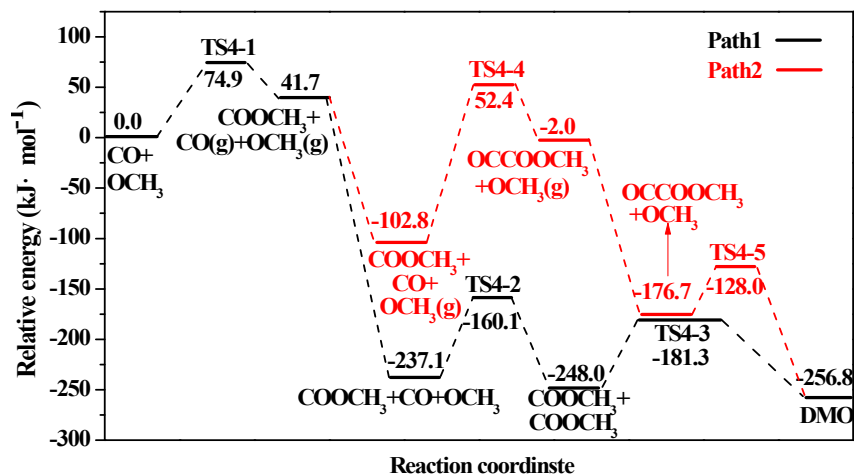

Fig. S4 The potential energy profile for the CO catalytic coupling reaction on Pd<sub>4</sub>/TiO<sub>2-v</sub>.<sup>1</sup>

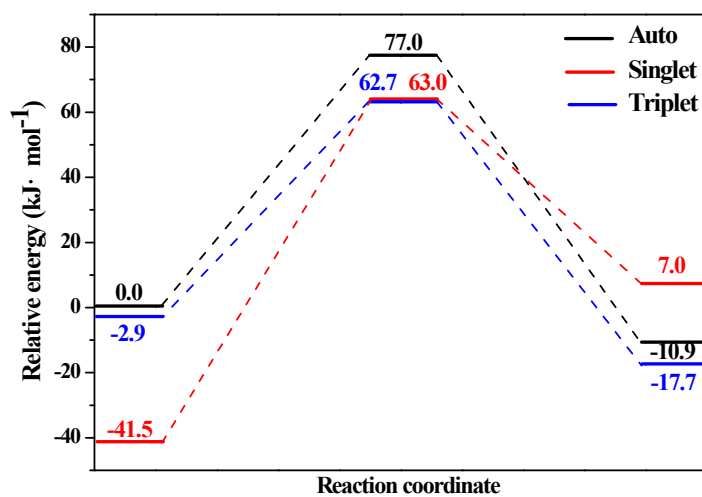

Fig. S5 The potential energy profile for the rate-determining step (COOCH<sub>3</sub>+CO+OCH<sub>3</sub> → COOCH<sub>3</sub>+COOCH<sub>3</sub>) on Pd<sub>4</sub>/TiO<sub>2-v</sub> with multiplicity of singlet, triplet and auto.

**Table S1** Adsorption energies ( $\text{kJ}\cdot\text{mol}^{-1}$ ) of stable species on the  $\text{Pd}_2/\text{TiO}_2\text{-v}$ ,  $\text{Pd}_3/\text{TiO}_2\text{-v}$ ,  $\text{Pd}_4/\text{TiO}_2\text{-v}$  and  $\text{Pd}_6/\text{TiO}_2\text{-v}$ .

|                                         | $E_{\text{ads}} (\text{Pd}_2/\text{TiO}_2\text{-v})$ | $E_{\text{ads}} (\text{Pd}_3/\text{TiO}_2\text{-v})$ | $E_{\text{ads}} (\text{Pd}_4/\text{TiO}_2\text{-v})$ | $E_{\text{ads}} (\text{Pd}_6/\text{TiO}_2\text{-v})$ |
|-----------------------------------------|------------------------------------------------------|------------------------------------------------------|------------------------------------------------------|------------------------------------------------------|
| CO-OCH <sub>3</sub>                     | -345.2                                               | -418.0                                               | -441.2                                               | -368.9                                               |
| COOCH <sub>3</sub>                      | -250.3                                               | -253.2                                               | -259.9                                               | -218.2                                               |
| COOCH <sub>3</sub> -CO                  | -367.3                                               | -394.8                                               | -404.4                                               | -358.5                                               |
| OCCOOCH <sub>3</sub>                    | -284.3                                               | -207.6                                               | -257.7                                               | -259.0                                               |
| OCCOOCH <sub>3</sub> -OCH <sub>3</sub>  | -558.4                                               | -382.4                                               | -432.4                                               | -472.9                                               |
| COOCH <sub>3</sub> -CO-OCH <sub>3</sub> | -583.6                                               | -639.3                                               | -538.7                                               | -602.9                                               |
| COOCH <sub>3</sub> -COOCH <sub>3</sub>  | -530.5                                               | -453.8                                               | -410.1                                               | -453.2                                               |
| DMO                                     | -34.0                                                | -8.6                                                 | -72.2                                                | -79.1                                                |

*References:*

- [1] Y. T. Cao, L. X. Ling, H. Lin, M. H. Fan, P. Liu, R. G. Zhang and B. J. Wang, *Comput. Mater. Sci.*, 2019, **159**, 1-11.
